# Supplementary material
Source: publisher figshare collection journal article supplement (https://tandf.figshare.com/ndownloader/files/42106403)
Supplement: Supplementary file 1 [file 42106403]

# Decadal glacier area changes in the Arctic using object-based image analysis in Google Earth Engine

Asim Ali<sup>1</sup>, Paul Dunlop<sup>1</sup>, Sonya Coleman<sup>2</sup>, Dermot Kerr<sup>2</sup>, Robert W McNabb<sup>1</sup>, and Riko Noormets<sup>3</sup>

<sup>1</sup>School of Geography and Environmental Sciences, Ulster University, UK; <sup>2</sup>School of Computing, Engineering, and Intelligent Systems, Ulster University, UK; <sup>3</sup>School of Marine, Geology, and Geophysics, University Centre in Svalbard

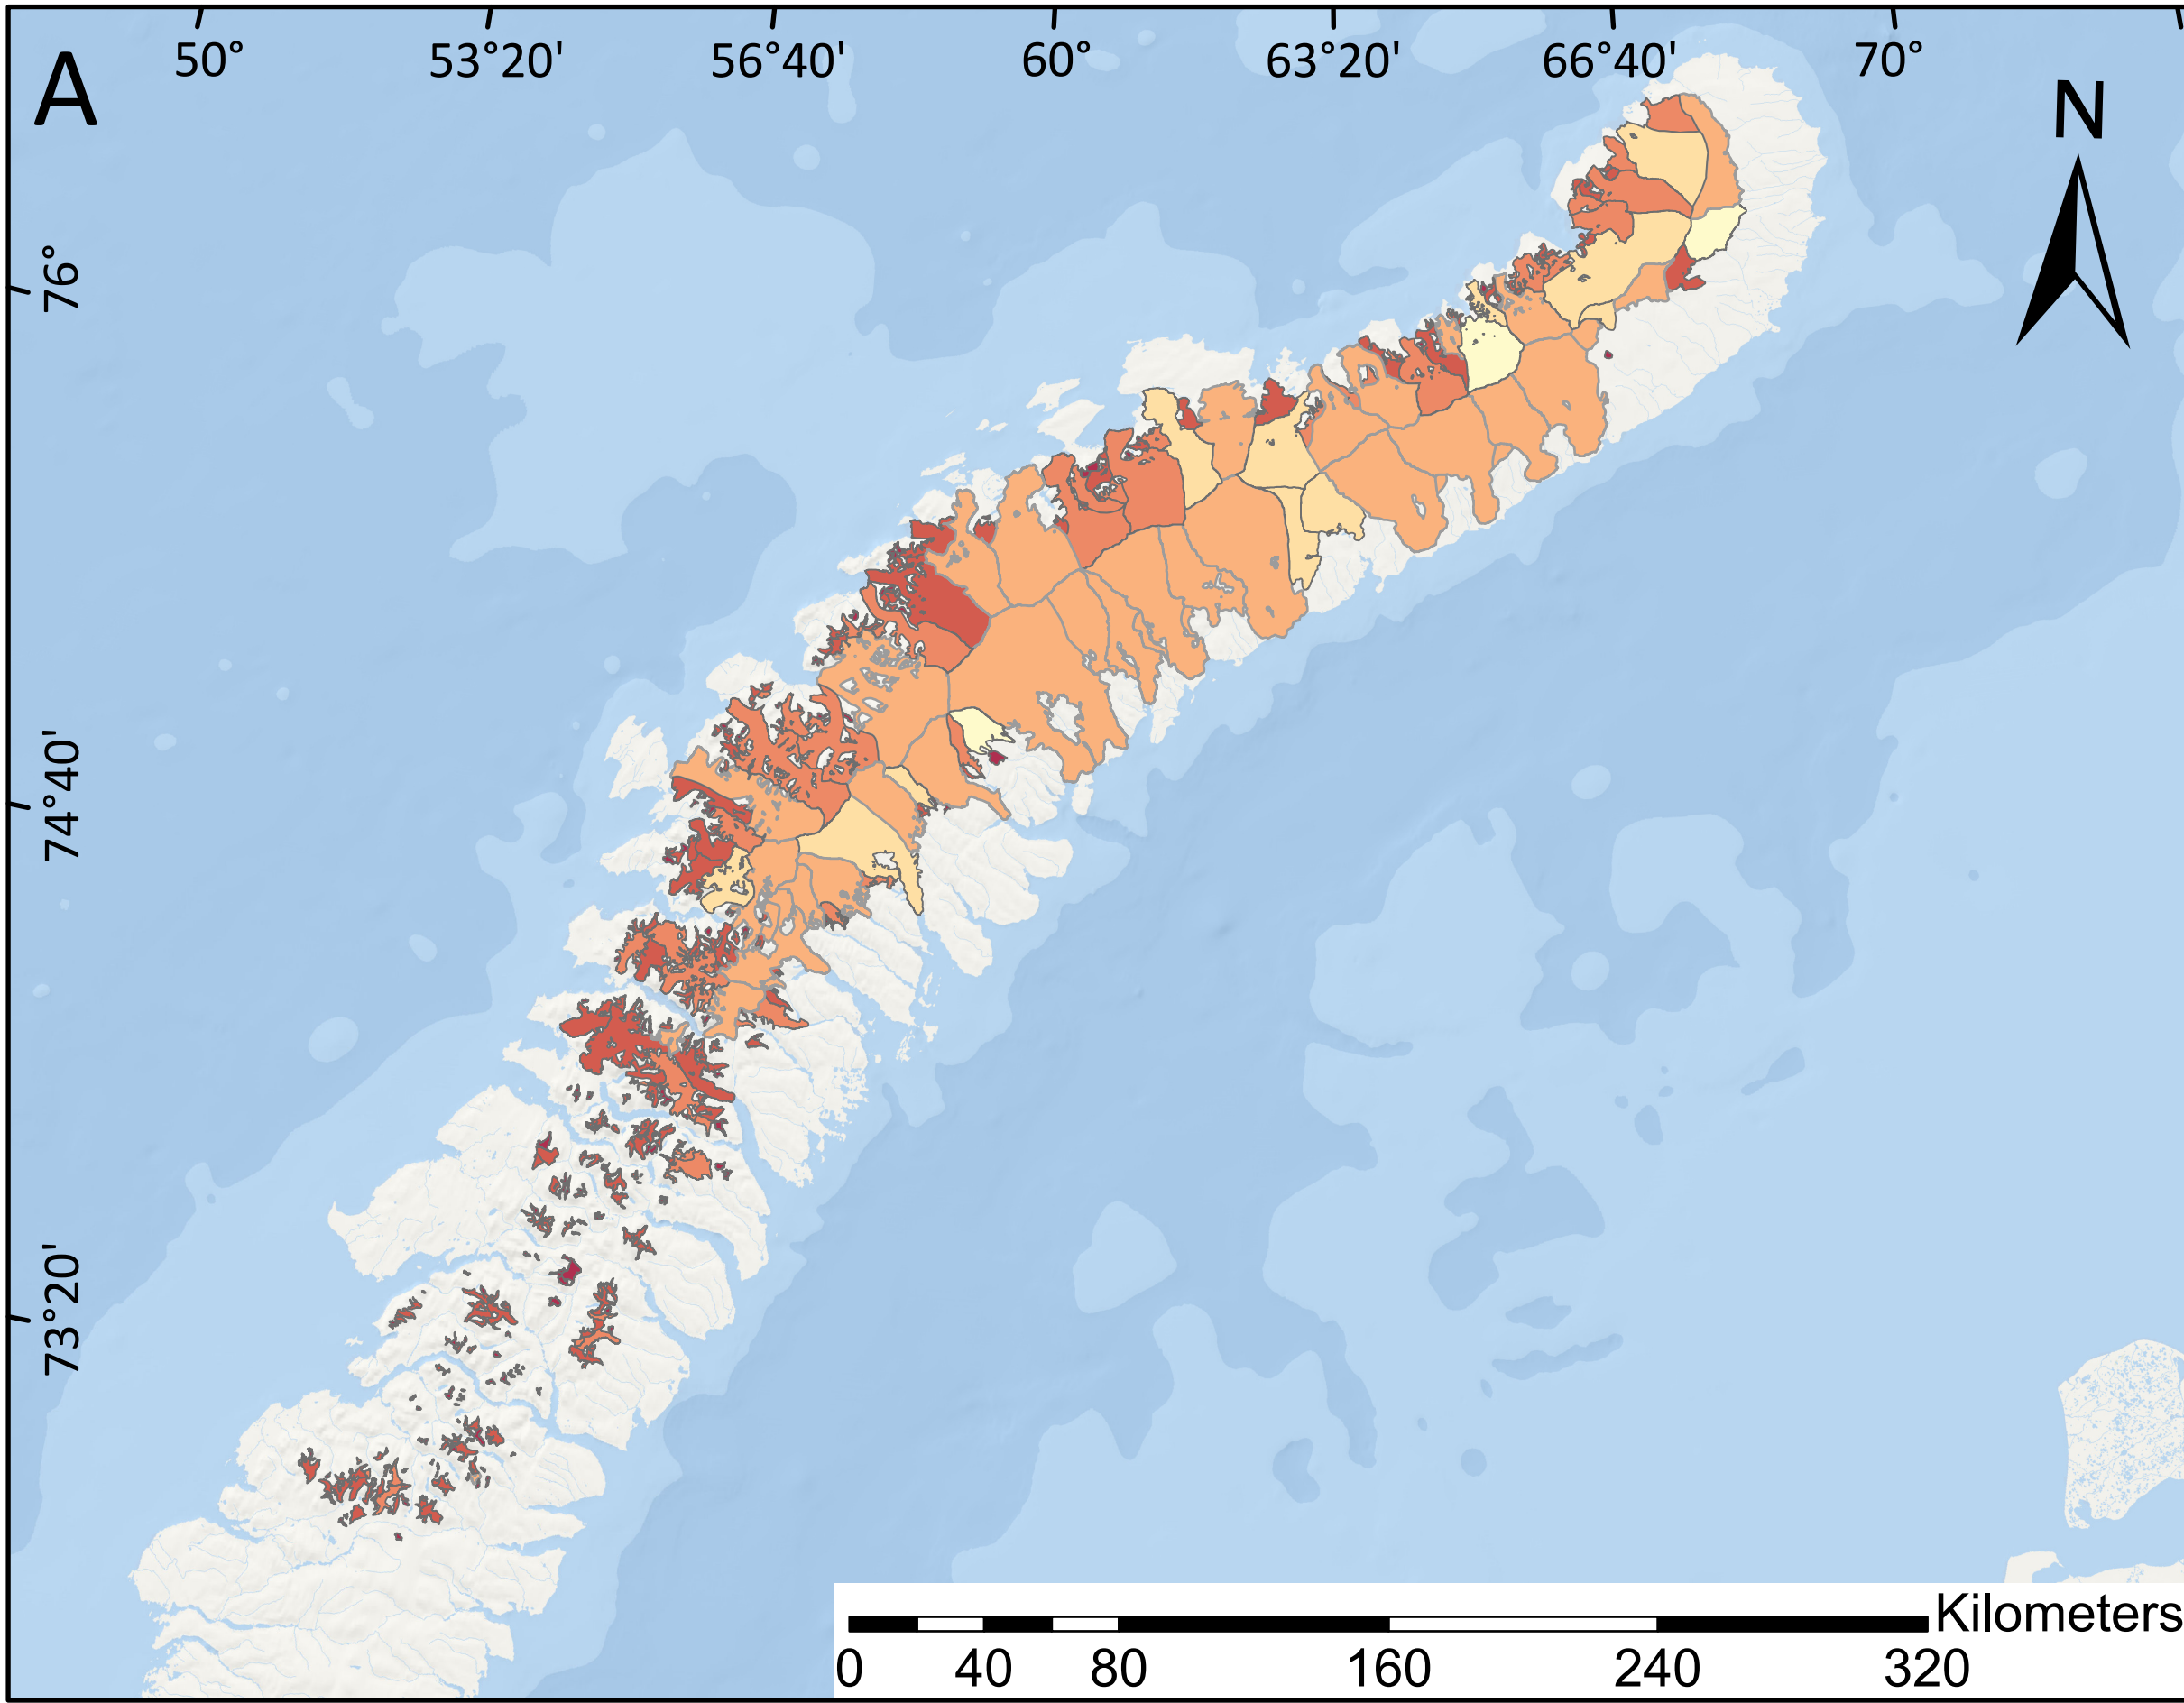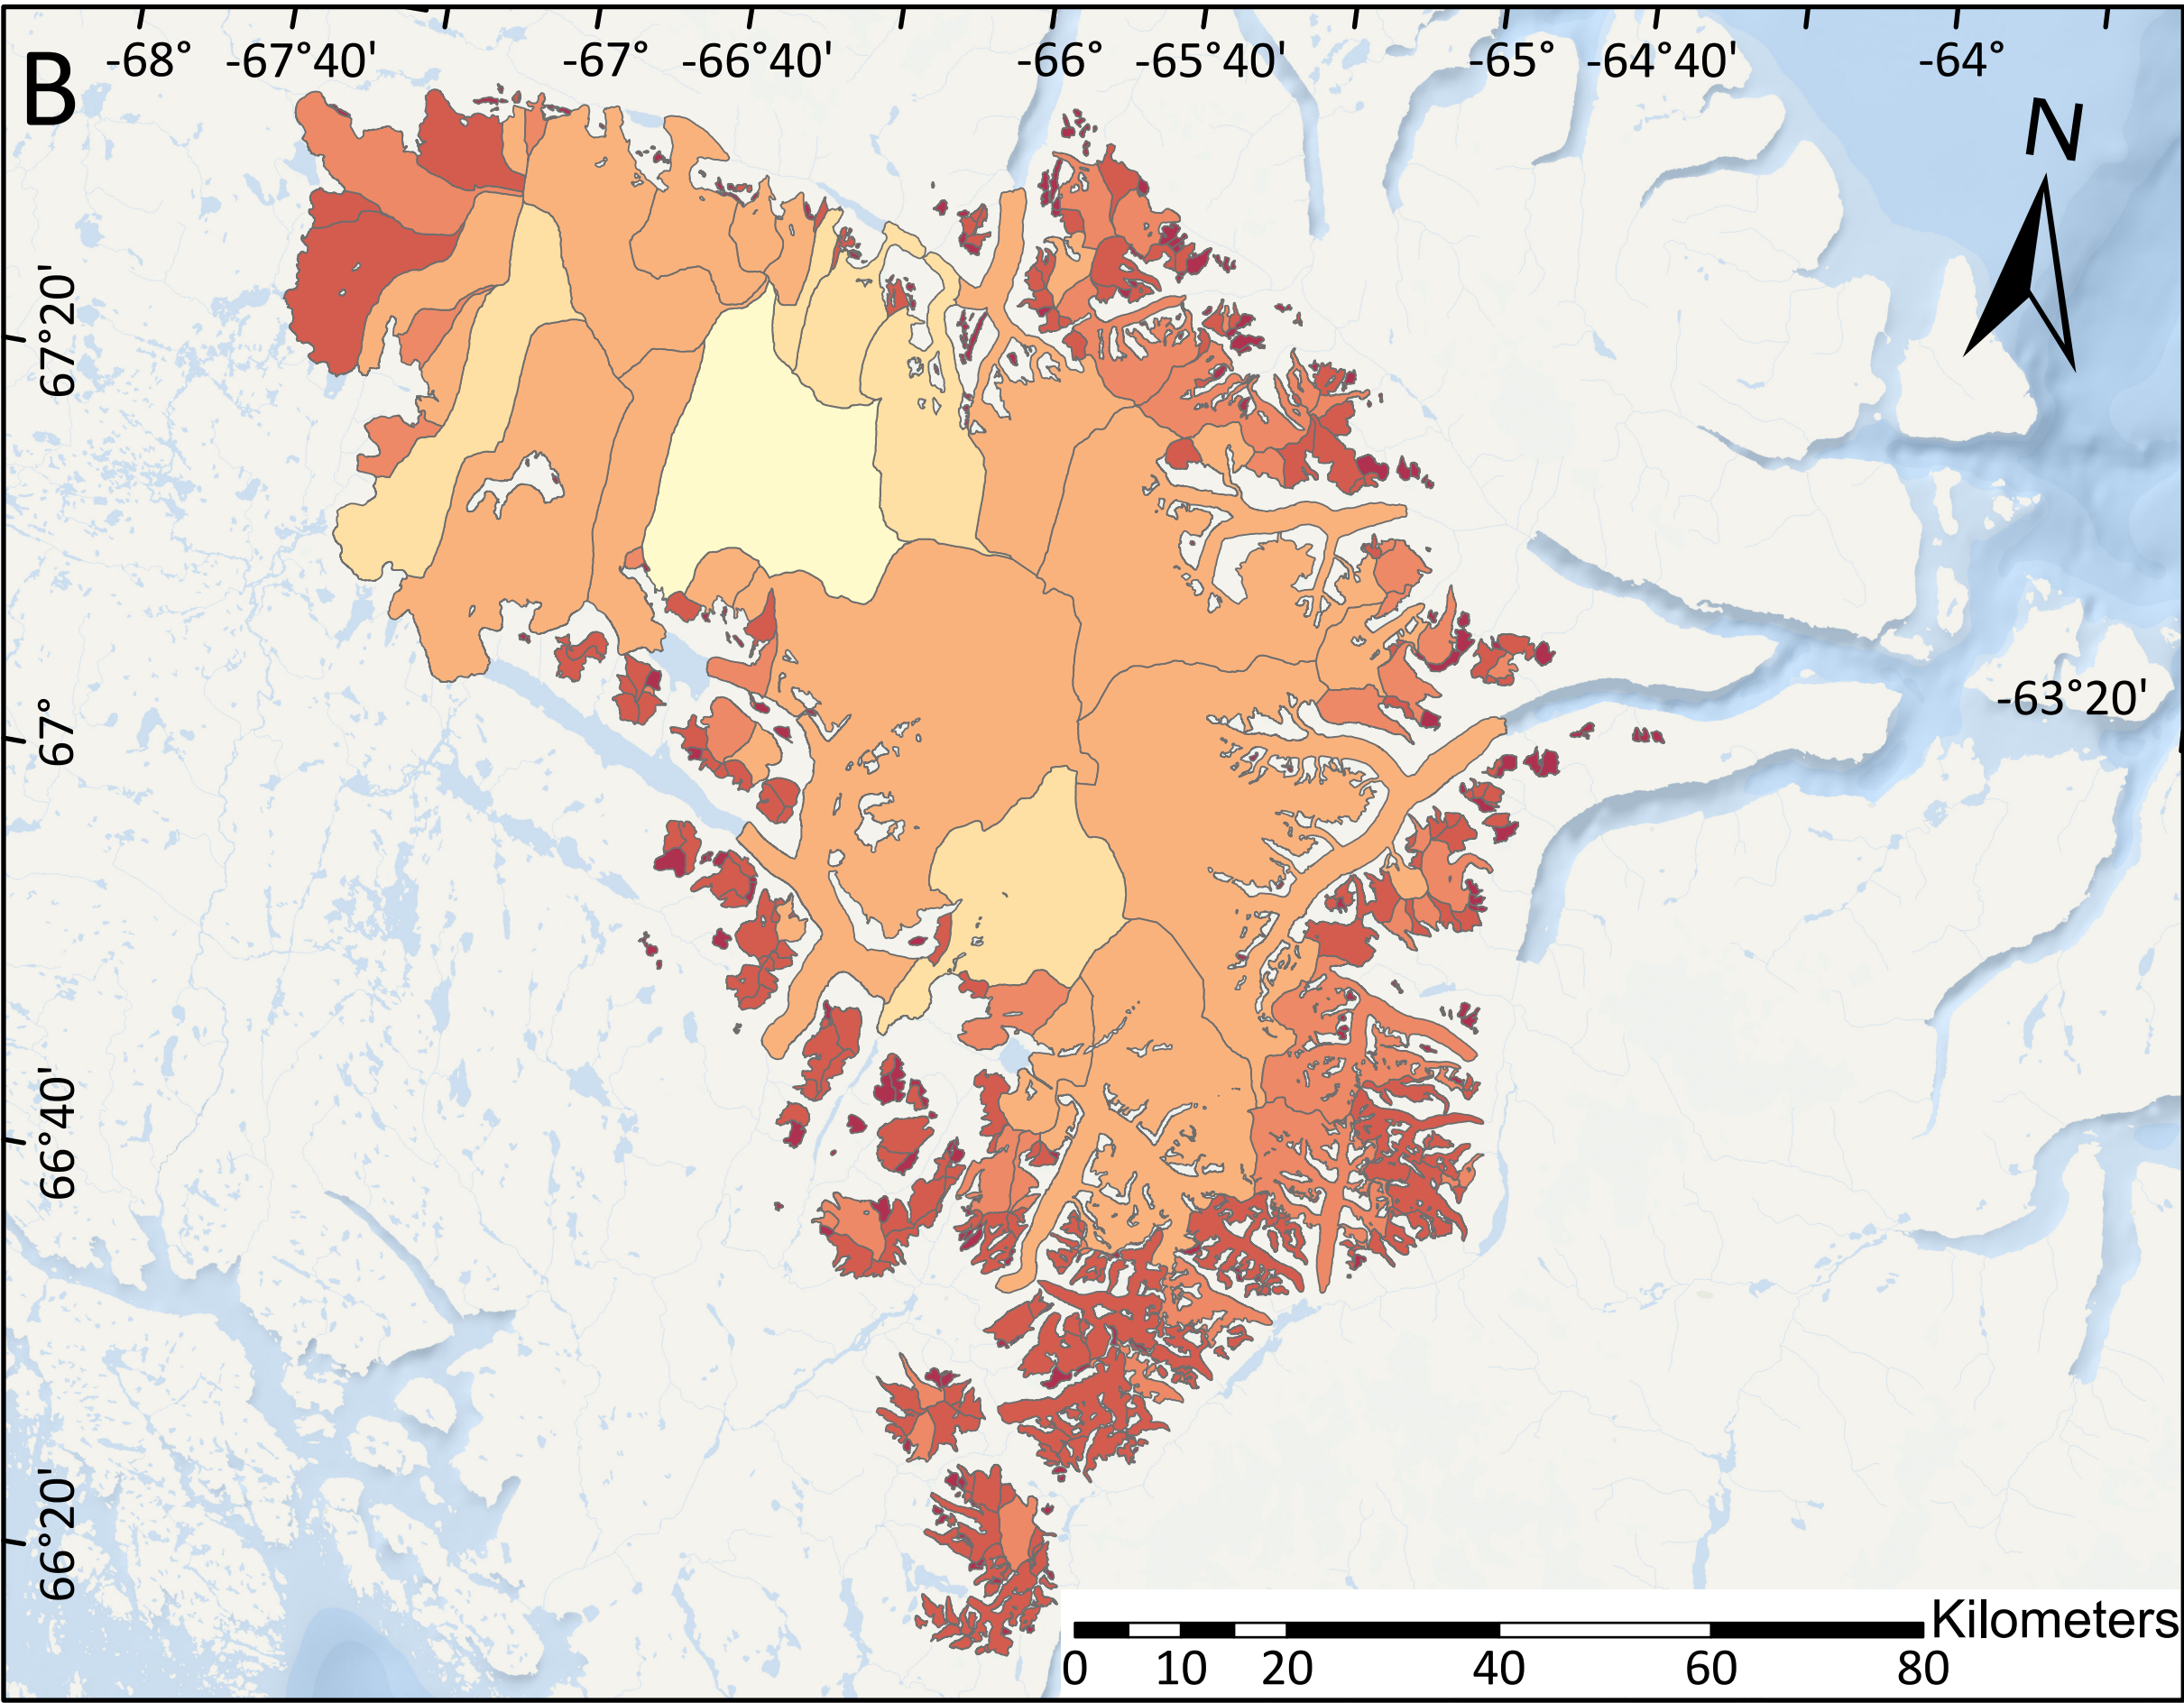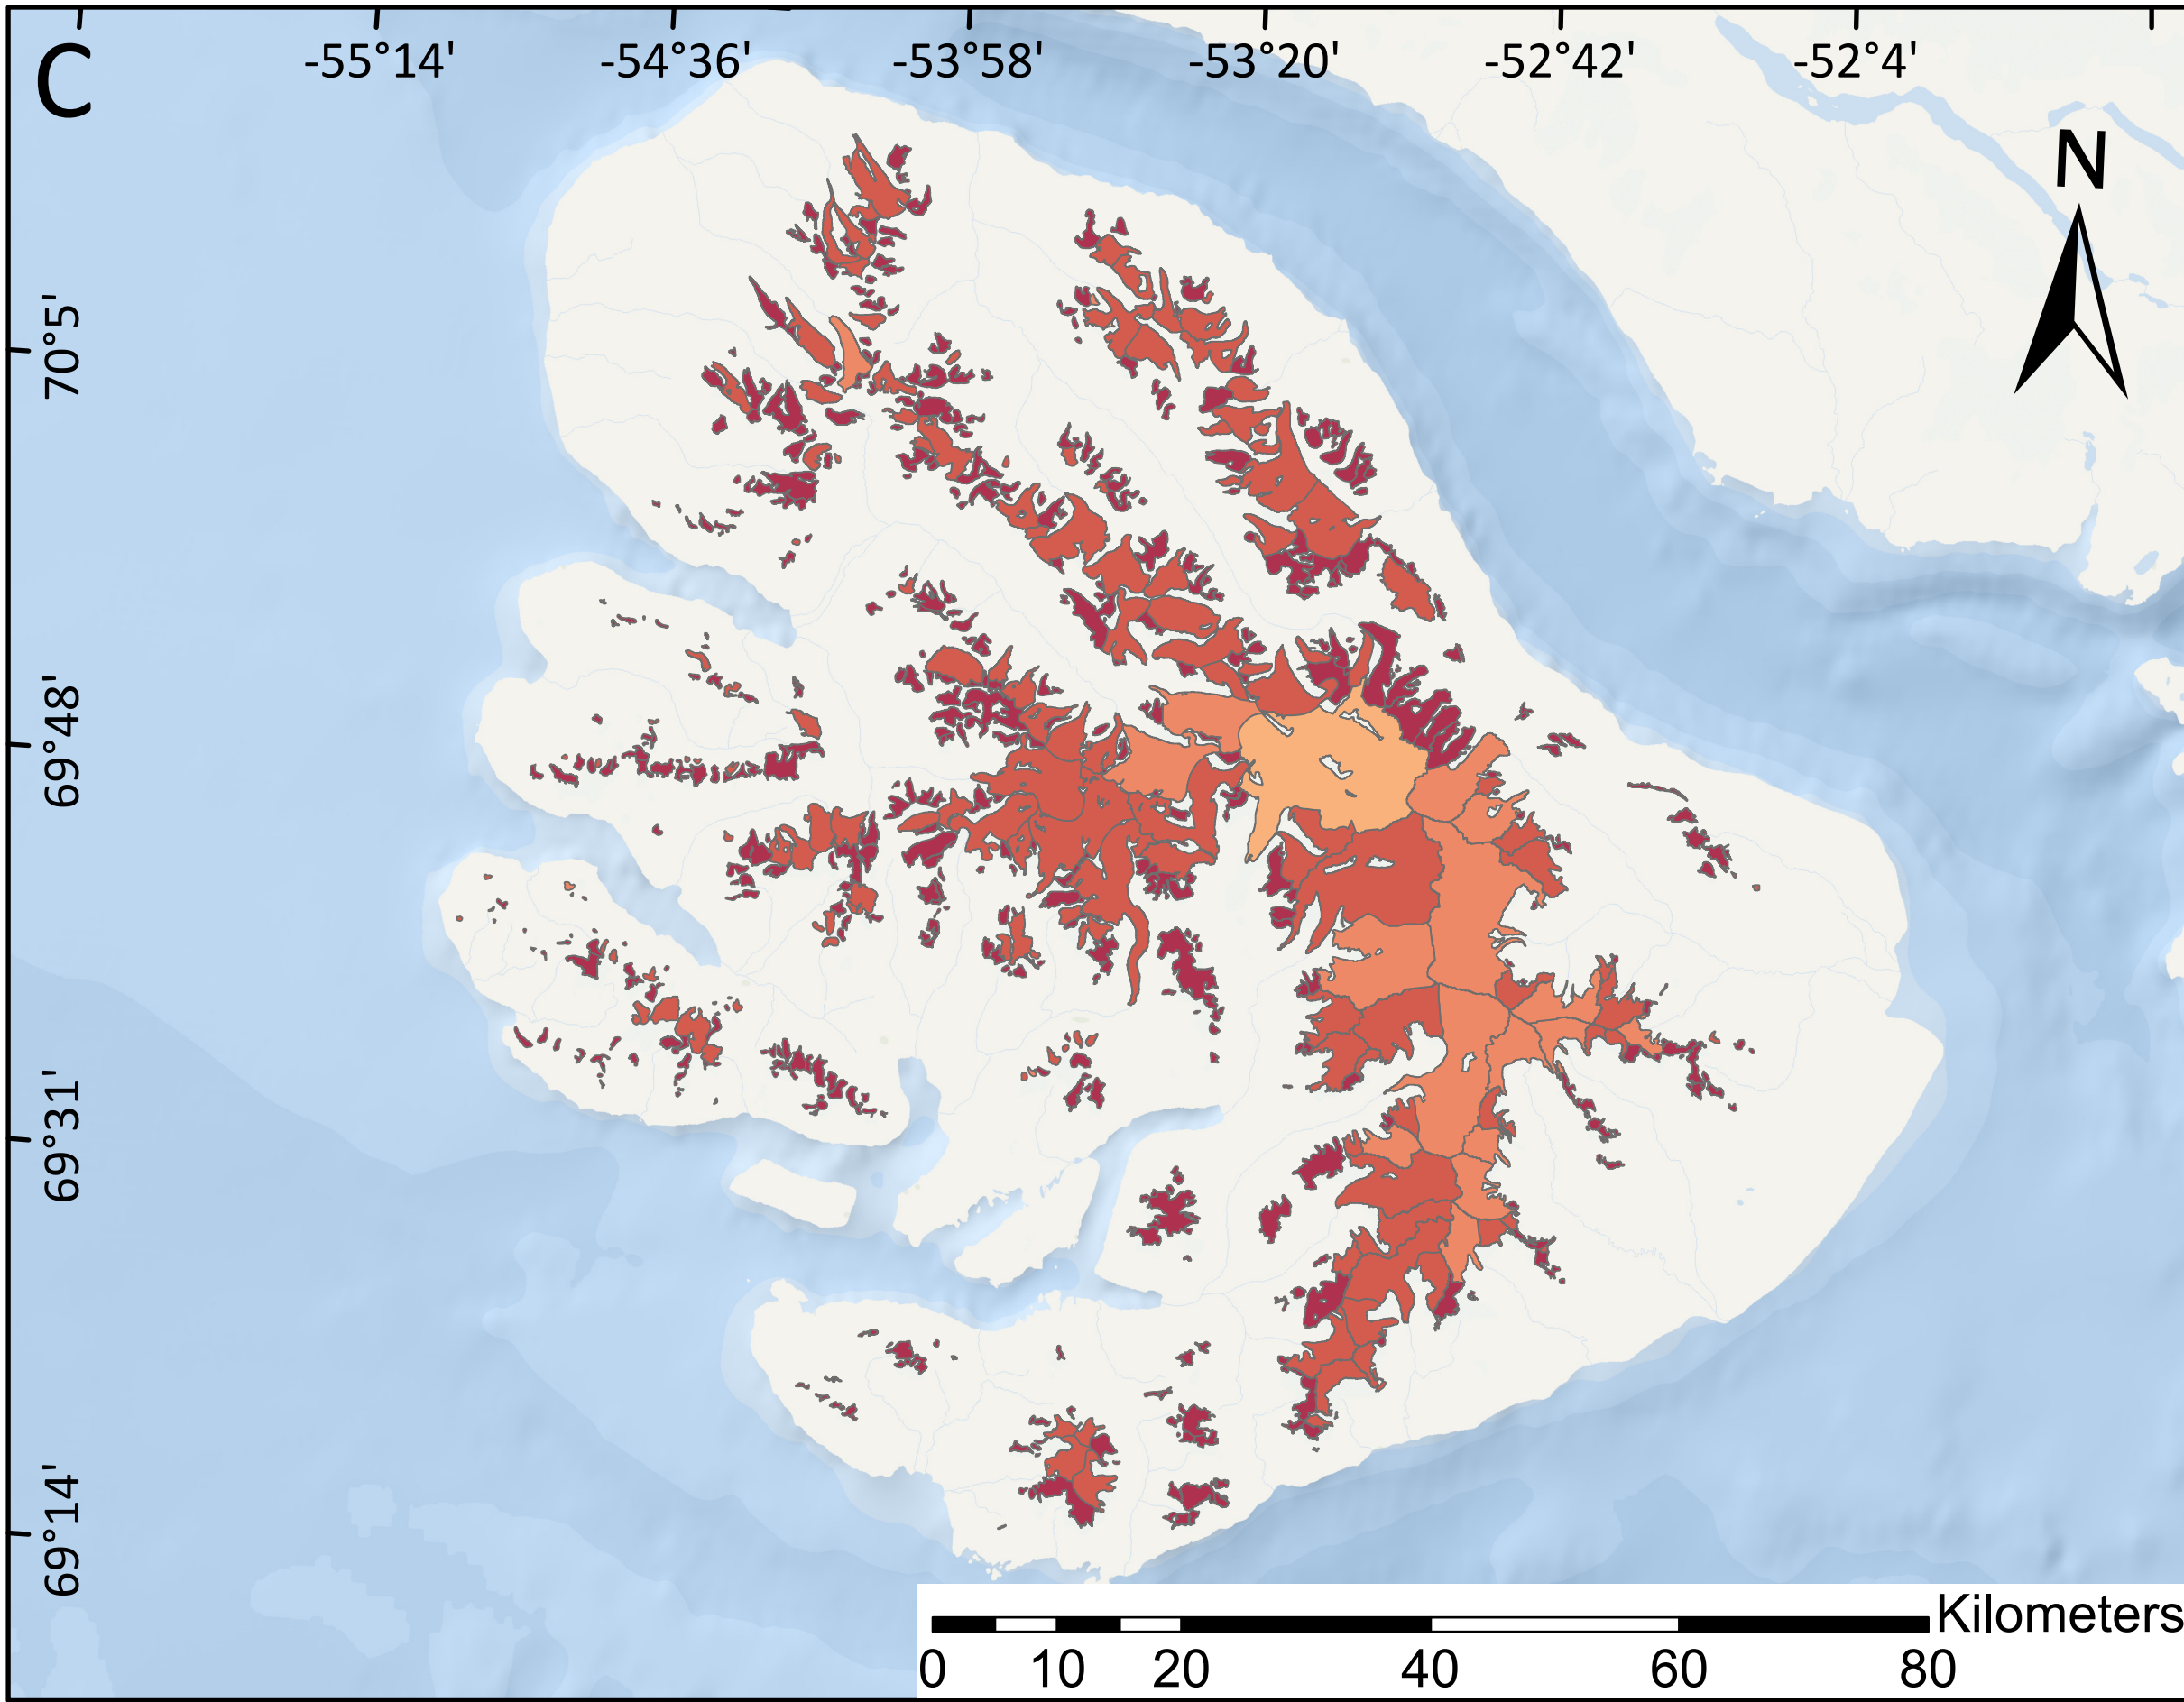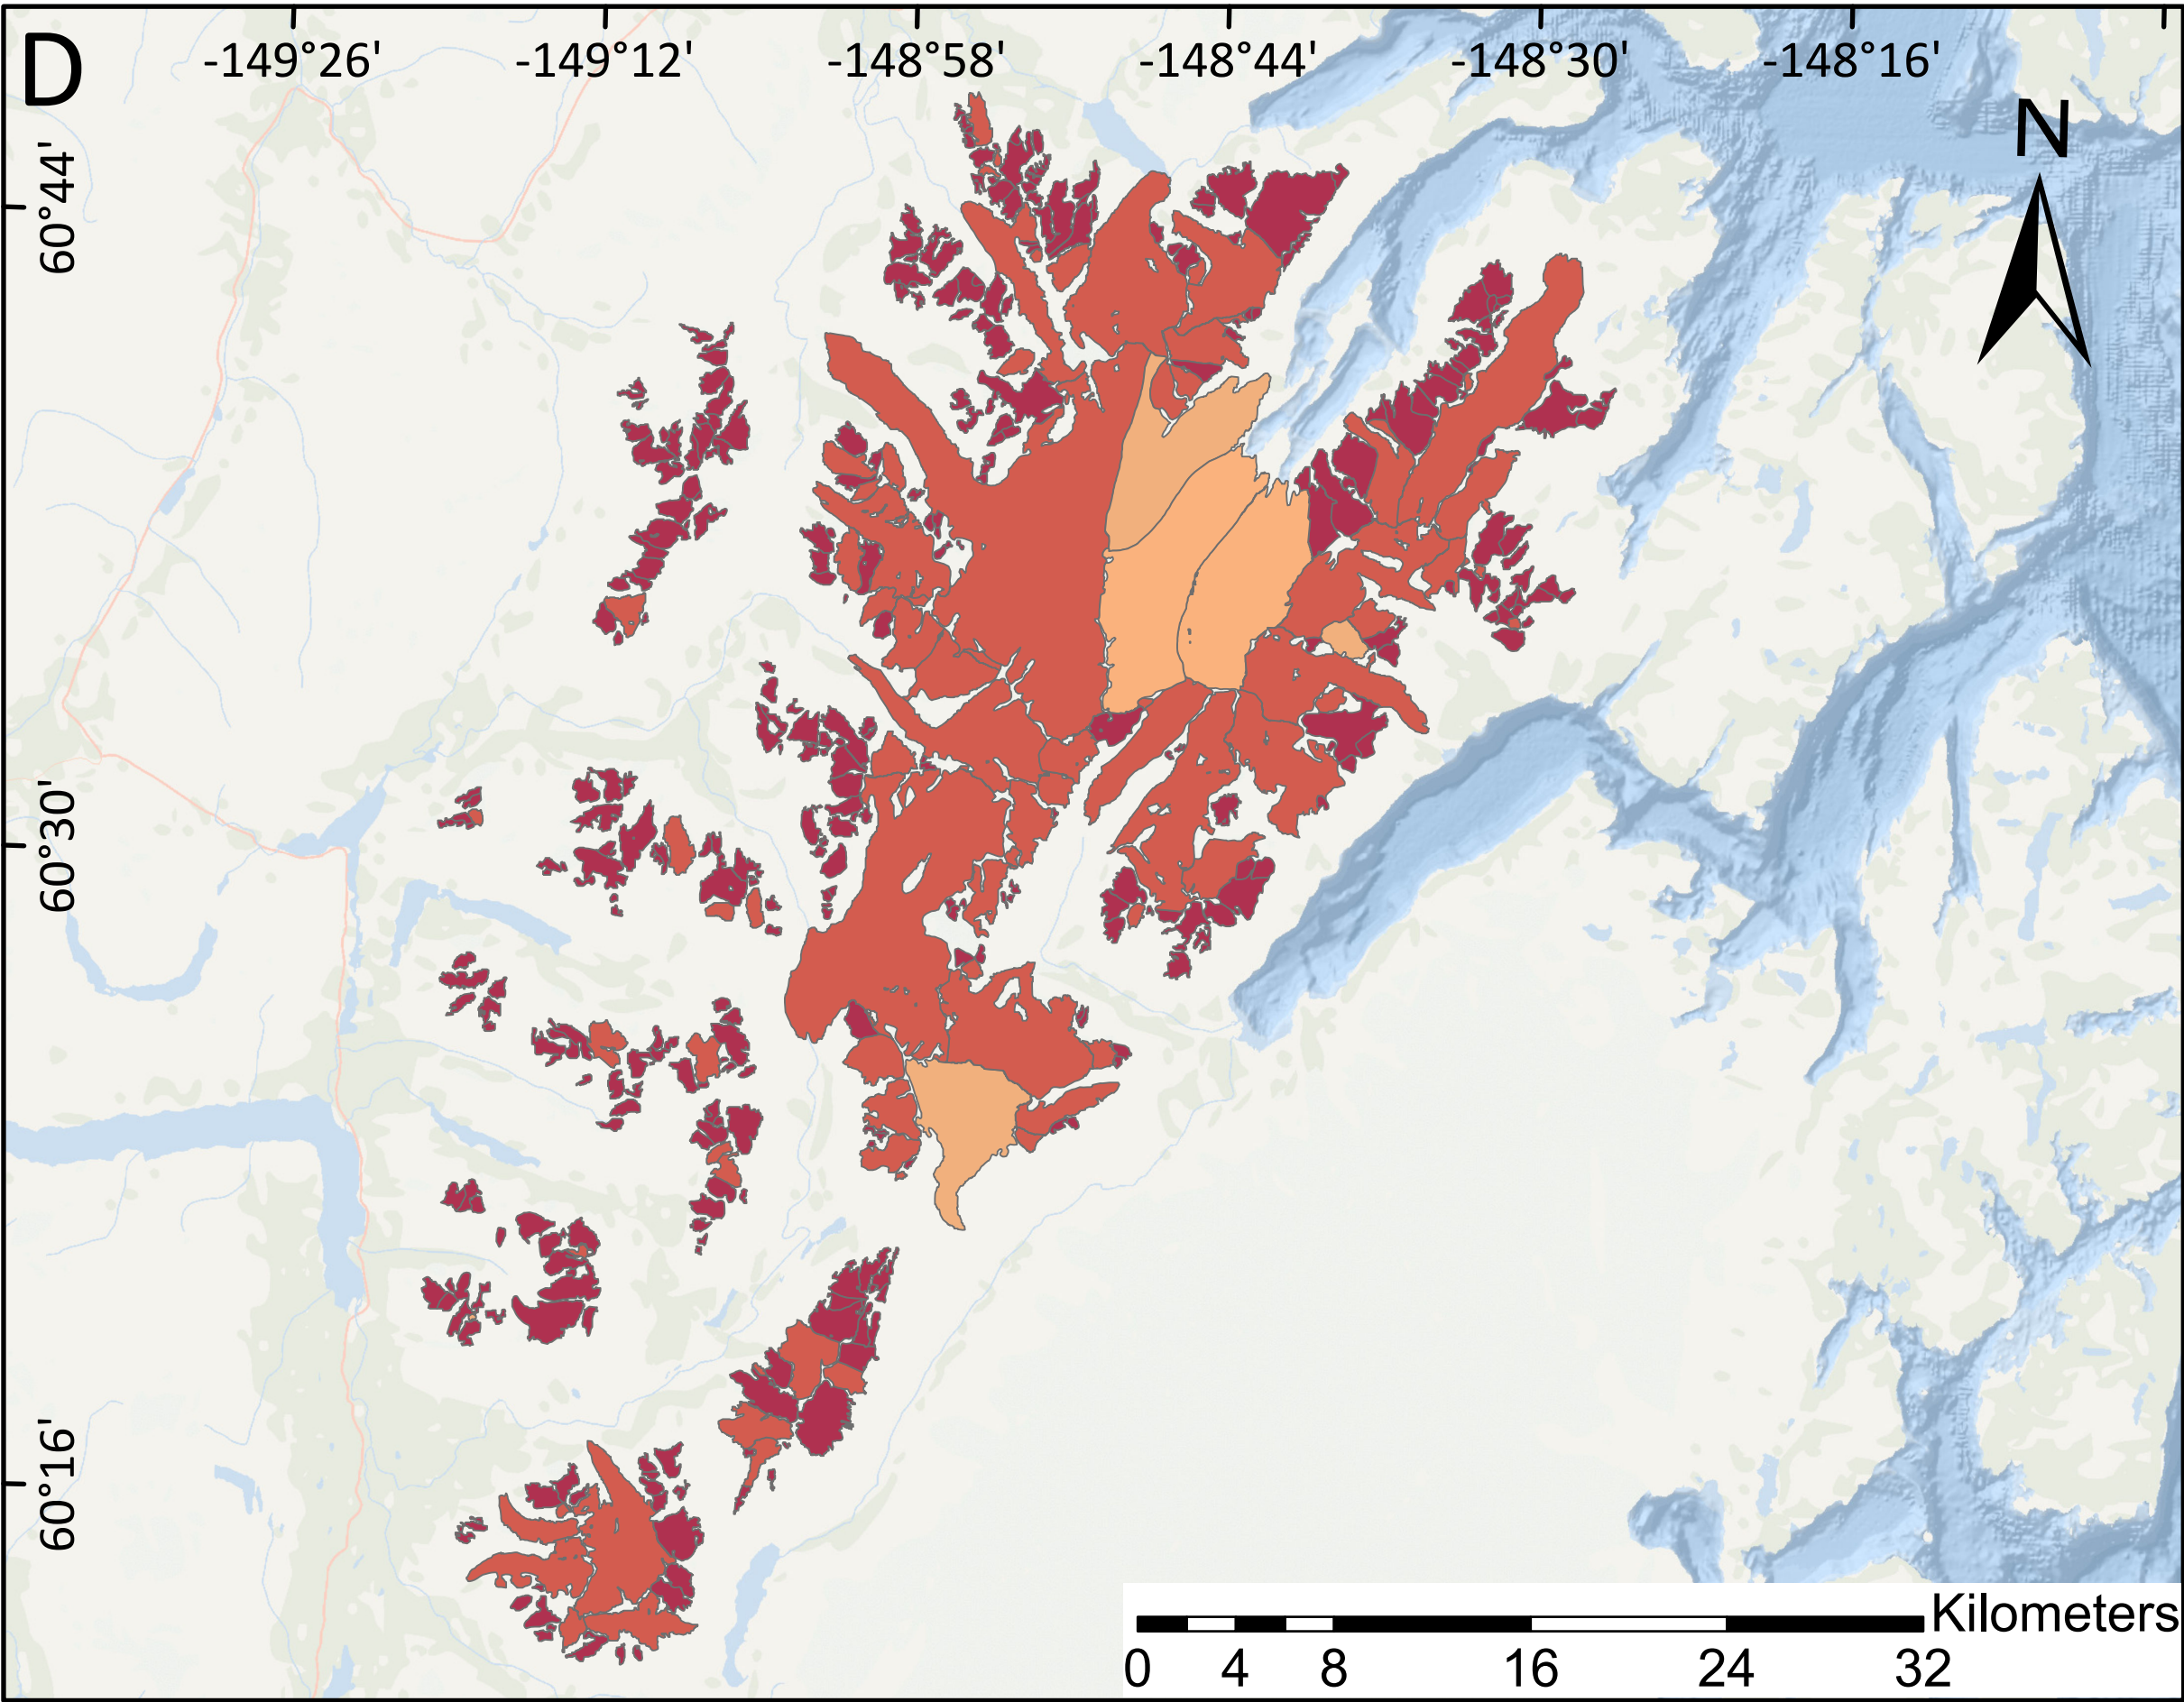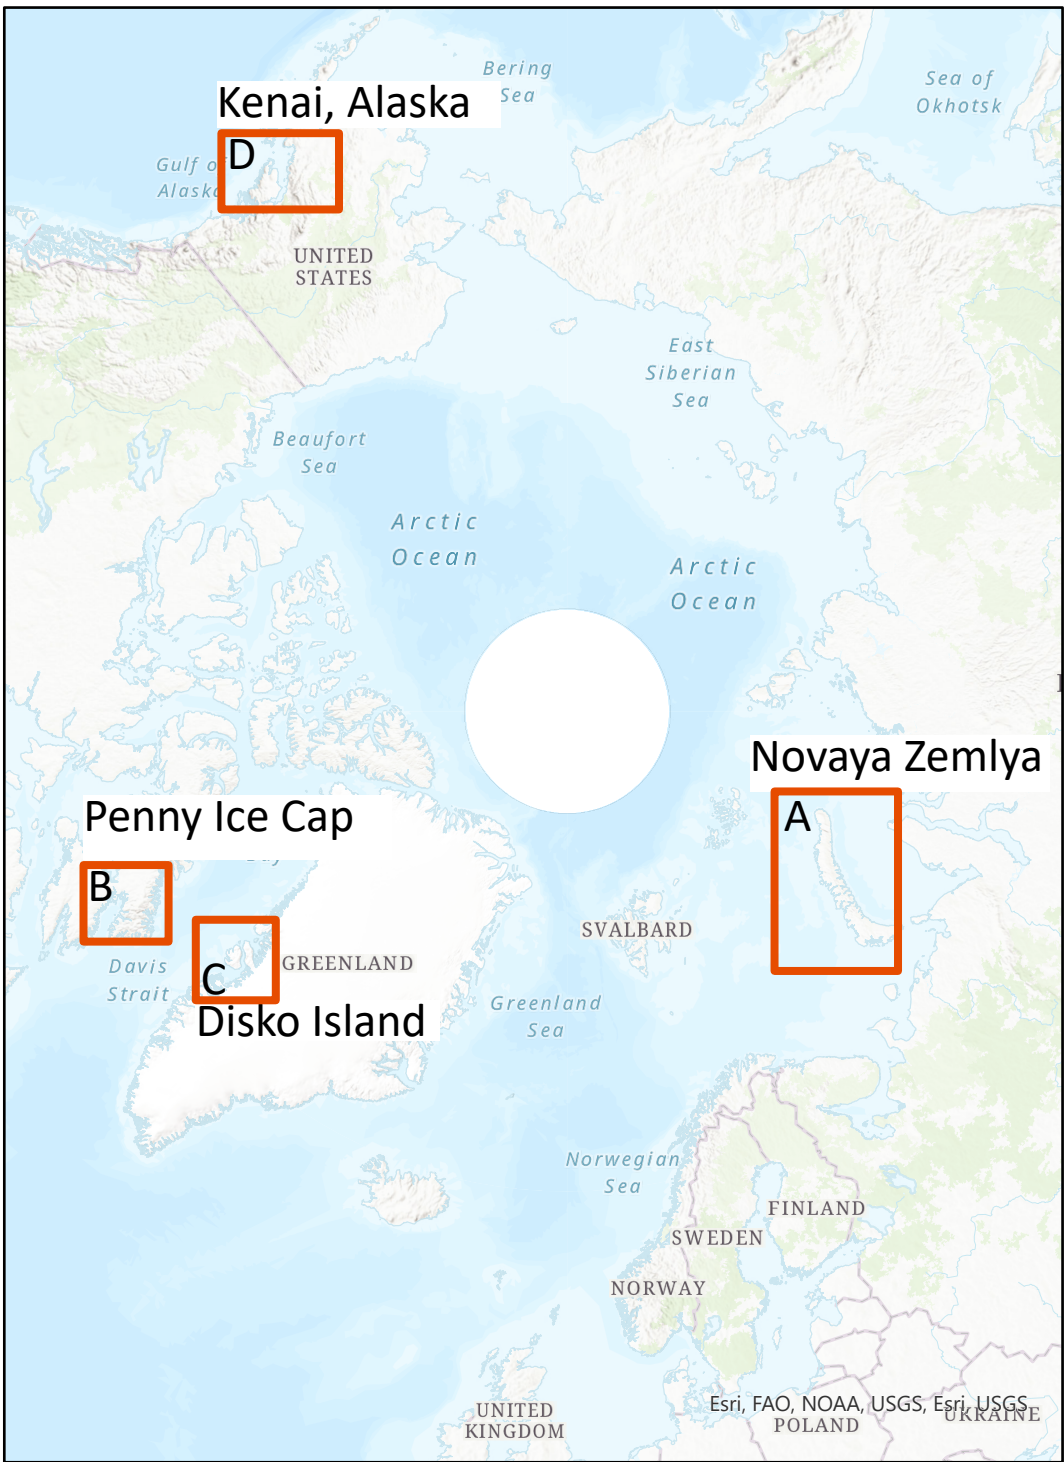

## Area Change (%) 1985-89 to 2019-21

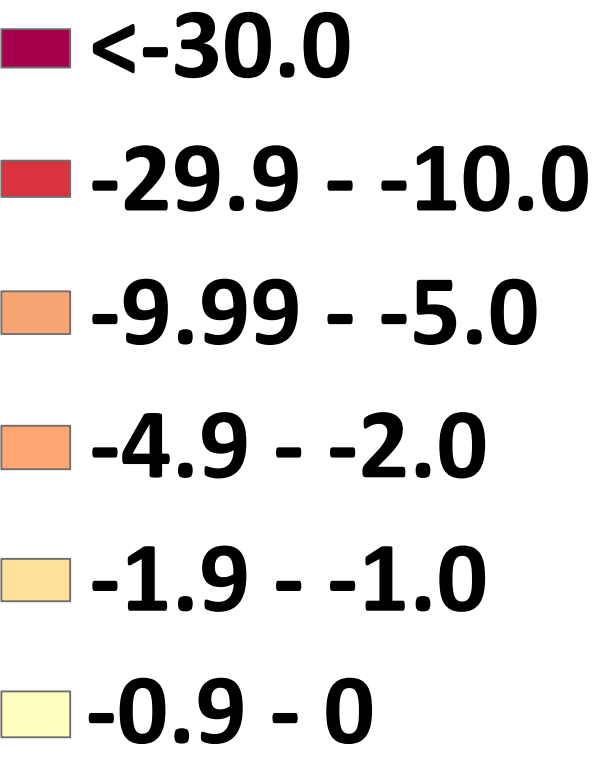

### Data used

Landsat 5 Thematic Mapper (TM), Landsat 7 Enhanced Thematic Mapper Plus (ETM+), and Landsat 8 Operational Land Imager (OLI) satellites images were used to map glacier changes and create outlines in these four different regions.

Object based-image analysis method was used in Google Earth Engine to create the glacier outlines. The map shows the changes of each glacier in Novaya Zemlya, Penny Ice Cap, Disko Island, and part of Kenai, Alaska from 1985-89 to 2019-21.

This map was created as part of Asim Ali Ph.D. research.  
Correspondence email: ali-a18@ulster.ac.uk  
© Journal of Maps, 2023
